# Supplementary material
Source: publisher figshare collection journal article supplement (https://frontiersin.figshare.com/ndownloader/files/24492989)
Supplement: Supplementary file [file 24492989]

**S1 Table.** List of fungal strains.

| <b>Species</b> | <b>Isolate</b>    | <b>Host</b>          | <b>Origin</b>    | <b>Date isolated</b> | <b>Source</b>    |
|----------------|-------------------|----------------------|------------------|----------------------|------------------|
| V.dahliae      | 12008             | Strawberry           | Kent, UK         | 1985                 | Laboratory stock |
| V.dahliae      | 12061             | Strawberry           | Lenham, UK       | 1986                 | Laboratory stock |
| V.dahliae      | 12062             | Strawberry           | Hampshire, UK    | 1965                 | Laboratory stock |
| V.dahliae      | 12064             | Chrysanthemum        | Bristol, UK      | 1968                 | Laboratory stock |
| V.dahliae      | 12065             | Potato               | Canada, USA      | 1969                 | Laboratory stock |
| V.dahliae      | 12067             | Tomato               | Dorset, UK       | 1971                 | Laboratory stock |
| V.dahliae      | 12068             | Hops                 | UK               | NA                   | Laboratory stock |
| V.dahliae      | 12072             | Gerbera              | Japan            | 1998                 | Laboratory stock |
| V.dahliae      | 12073             | Chinese Cabbage      | Japan            | 1998                 | Laboratory stock |
| V.dahliae      | 12086             | Strawberry - petiole | Kent, UK         | 1998                 | Laboratory stock |
| V. dahliae     | 12158             | Strawberry           | Kent, UK         | 2000                 | Laboratory stock |
| V. dahliae     | 12161             | Strawberry           | Lincolnshire, UK | 2000                 | Laboratory stock |
| V. dahliae     | 12251             | Strawberry           | Kent, UK         | 2012                 | Laboratory stock |
| V. dahliae     | 12252             | Strawberry           | Kent, UK         | 2012                 | Laboratory stock |
| V. dahliae     | 12253             | Strawberry           | Kent, UK         | 2012                 | Laboratory stock |
| V.dahliae      | 12213             | Olive                | NA               | 2002                 | Laboratory stock |
| V. albo-atrum  | 11001             | Hop                  | Kent, UK         | 1987                 | Laboratory stock |
| V. albo-atrum  | 11006             | Hop                  | Kent, UK         | 1995                 | Laboratory stock |
| V. nubilum     | 15001             | NA*                  | NA               | NA                   | Laboratory stock |
| V. tricorpus   | 20001             | NA                   | NA               | 1998                 | Laboratory stock |
| V. dahliae     | <i>Δfrq_12008</i> | -                    | -                | -                    | This study       |
| V. dahliae     | <i>Δfrq_12253</i> | -                    | -                | -                    | This study       |
| V. dahliae     | <i>Δwc1_12253</i> | -                    | -                | -                    | This study       |
| N. crassa      | <i>30-7 bd a</i>  | -                    | NA               | NA                   | S. Crosthwaite   |

**S2 Table.** List of primers.

| Organism  | Target           | Gene name                | Name      | Sequence (5' to 3')   | Length (bp) | Sequence reference |
|-----------|------------------|--------------------------|-----------|-----------------------|-------------|--------------------|
| V.dahliae | Housekeeping     | Elongation factor alpha  | EFA1-F    | TACAACCCCAAGACTGTTCGC | 104         | [112]              |
| V.dahliae | Housekeeping     |                          | EFA1-R    | TCCTTCTCCCAGCCCTTGTA  |             |                    |
| V.dahliae | Housekeeping     | Tubuline Beta Chain      | VdTbc-F   | TTTCCAGATCACCCACTCC   | 111         | [49, 113]          |
| V.dahliae | Housekeeping     |                          | VdTbc-R   | ACGACCGAGAAGGTAGCC    |             |                    |
| V.dahliae | Gene of interest | frq                      | VdFrq-F   | GTGACGGAGAAGAGCACCAA  | 92          | This study         |
| V.dahliae | Gene of interest |                          | VdFrq-R   | TCGCTACTGAATCGCGTACC  |             |                    |
| V.dahliae | Gene of interest | Wc-1                     | VdWc1-F   | CAACACCCTGACCGAGTTCA  | 91          | This study         |
| V.dahliae | Gene of interest |                          | VdWc1-R   | ATTGGCGTCGAGAATCTGCA  |             |                    |
| V.dahliae | Gene of interest | cry                      | Vdcry_F   | GAAGGGTGGTGAGGTGGATG  | 177         | This study         |
| V.dahliae | Gene of interest |                          | Vdcry_R   | TTCACCATCTCCTCGTGCAC  |             |                    |
| V.dahliae | Gene of interest | ccg16                    | Vdccg16_F | CCCAAGGCATCACAGTCGAA  | 118         | This study         |
| V.dahliae | Gene of interest |                          | Vdccg16_R | GCACCATTTGTTGTTGCCGAT |             |                    |
| V.dahliae | Gene of interest | vvd                      | Vdvvd_F   | GATGTTTCATGAACGGCGAGC | 135         | This study         |
| V.dahliae | Gene of interest |                          | Vdvvd_R   | GTCAGCCGATCTTCTCCTCG  |             |                    |
| N.crassa  | Housekeeping     | TATA binding box protein | NcTbp-F   | GGTGCCAAGTCCGAAGATGA  | 136         | [114]              |
| N.crassa  | Housekeeping     |                          | NcTbp-R   | TGGGGAACCTTGATGTCGCAA |             |                    |
| N.crassa  | Housekeeping     | Beta-tubulin             | NcBtl-F   | CCACTTCTTCATGGTCGGCT  | 103         | [114]              |
| N.crassa  | Housekeeping     |                          | NcBtl-R   | CTTGGGGTCGAACATCTGCT  |             |                    |
| N.crassa  | Gene of interest | Frequency                | NcFrq-F   | TCGACATCGCAGAGGAGAAA  | 66          | [115]              |
| N.crassa  | Gene of interest |                          | NcFrq-R   | CAACGAAACCCCAGACGAGT  |             |                    |

|                                      | Primer pair  | DNA Template         | Overhang 5' - 3' | Sequence 5' - 3'         | Length (bp) | Sequence reference |
|--------------------------------------|--------------|----------------------|------------------|--------------------------|-------------|--------------------|
| USER-Brick                           | B1-F         | pRF-HU2              | AAGGTTTAAU       | TCACTGGCCGTCGTTTTA       | 2165        | [56]               |
|                                      | B1-R         |                      | ATTTAAAGAU       | CCGCGCGAGC               |             |                    |
|                                      | HygR1-F      | pRF-HU2              | ACGCAATACU       | AGTCGGGGGATCCTCTAG       | 2480        | [56]               |
|                                      | HygR1-R      |                      | ACTAGGTCAU       | GGGCCCATCGATGATCAG       |             |                    |
|                                      | B2-F         | pRF-HU2              | ATCTTTAAAU       | GGAGTGTCTTCTTCCCA        | 1658        | [56]               |
|                                      | B2-R         |                      | AATACGACCU       | TCGTGACTCCCTTAATTCT      |             |                    |
|                                      | HRFrq1-F     | <i>V. dahliae</i>    | AGGTCGTATU       | GAGACTTCAGTAAATTGTGGTTGT | 1600        | This study         |
|                                      | HRFrq1-R     |                      | AGTATTGCGU       | AGAGTCGTTGTCGTCGGG       |             |                    |
|                                      | HRFrq2-F     | <i>V. dahliae</i>    | ATGACCTAGU       | GATCACATTTTGCATCTTTCGGG  | 1565        | This study         |
|                                      | HRFrq2-R     |                      | ATTAAACCTU       | GTCACCATGACTCGCTACAA     |             |                    |
| Plasmid validation                   | B1.B2-F      | pEcFrq-D1            |                  | TGTCATACCACTTGTCCGCC     | 461         | This study         |
|                                      | B1.B2-R      |                      |                  | CTGCCTGTTCCAAAGGTCCT     |             |                    |
|                                      | B1.B2.F1.H-F | pEcFrq-D1            |                  | ATGTTGCTGTCTCCCAGGTC     | 3600        | This study         |
|                                      | B1.B2.F1.H-R |                      |                  | CCTATATCGCCGACATCACC     |             |                    |
|                                      | H.F2.B1-F    | pEcFrq-D1            |                  | GTATGACCGGGTCGTTCACT     | 2190        | This study         |
|                                      | H.F2.B1-R    |                      |                  | CTGGCTGGTGGCAGGATA       |             |                    |
| <i>V. dahliae</i> mutants validation | TestHygr_F   | $\Delta$ frq mutants |                  | ATTTGTGTACGCCCCGACAGT    | 624         | This study         |
|                                      | TestHygr_R   |                      |                  | AGACCTGCCTGAAACCGAAC     |             |                    |
|                                      | TestFrq-F    | $\Delta$ frq mutants |                  | CCATCTTCGGCGCATTTGAG     | 563         | This study         |
|                                      | TestFrq-R    |                      |                  | ACTGTGAGGAATTGCTGCGA     |             |                    |
|                                      | FrqUS_Hygr-F | $\Delta$ frq mutants |                  | AGTTCCACTCGTTCGCTCTG     | 2182        | This study         |
|                                      | FrqUS_Hygr-R |                      |                  | CGCCTATATCGCCGACATCA     |             |                    |

**S3 Table.** List of significantly enriched GO terms related to biological processes in *Δfrq\_12253* versus the WT\_12253 strain in light and dark.

| GO.ID      | Biological process term                          | Δfrq vs WT in D |          | Δfrq vs WT in L |          |
|------------|--------------------------------------------------|-----------------|----------|-----------------|----------|
|            |                                                  | UP              | DOWN     | UP              | DOWN     |
| GO:0006412 | translation                                      | 5.40E-11        |          | 2.00E-16        |          |
| GO:0006414 | translational elongation                         | 3.40E-05        |          |                 |          |
| GO:0008152 | metabolic process                                | 0.022           |          | 0.01            |          |
| GO:0045039 | protein import into mitochondrial inner membrane | 0.024           |          |                 |          |
| GO:0009306 | protein secretion                                | 0.024           |          | 0.032           |          |
| GO:0006228 | UTP biosynthetic process                         | 0.024           |          | 0.032           |          |
| GO:0006241 | CTP biosynthetic process                         | 0.024           |          | 0.032           |          |
| GO:0046836 | glycolipid transport                             | 0.024           |          |                 |          |
| GO:0006183 | GTP biosynthetic process                         | 0.024           |          | 0.032           |          |
| GO:0009116 | nucleoside metabolic process                     | 0.042           |          |                 |          |
| GO:0033566 | gamma-tubulin complex localization               |                 |          | 0.032           |          |
| GO:0055114 | oxidation-reduction process                      |                 | 2.90E-05 |                 | 8.20E-05 |
| GO:0007623 | circadian rhythm                                 |                 | 0.016    |                 | 0.0221   |
| GO:0019427 | acetyl-CoA biosynthetic process from acetate     |                 | 0.016    |                 |          |
| GO:0006788 | heme oxidation                                   |                 | 0.016    |                 | 0.0221   |
| GO:0009448 | gamma-aminobutyric acid metabolic processes      |                 | 0.031    |                 |          |
| GO:0006537 | glutamate biosynthetic process                   |                 | 0.032    |                 | 0.0437   |
| GO:0001682 | tRNA 5'-leader removal                           |                 | 0.032    |                 |          |
| GO:0009450 | gamma-aminobutyric acid catabolic processes      |                 | 0.032    |                 |          |
| GO:0072488 | ammonium transmembrane transport                 |                 | 0.047    |                 |          |
| GO:0006817 | phosphate ion transport                          |                 |          |                 | 0.0046   |
| GO:0042128 | nitrate assimilation                             |                 |          |                 | 0.0046   |
| GO:0006810 | transport                                        |                 |          |                 | 0.0129   |
| GO:0042554 | superoxide anion generation                      |                 |          |                 | 0.0221   |
| GO:0009405 | pathogenesis                                     |                 |          |                 | 0.0221   |
| GO:0006809 | nitric oxide biosynthetic process                |                 |          |                 | 0.0221   |
| GO:0000160 | phosphorelay signal transduction system          |                 |          |                 | 0.042    |
| GO:0009395 | phospholipid catabolic process                   |                 |          |                 | 0.0437   |
| GO:0006730 | one-carbon metabolic process                     |                 |          |                 | 0.0437   |

**S4 Table.** Expression of putative core clock genes, photoreceptor- and TF-encoding genes in WT 12253 and *Δfrq\_12253* in both light and dark conditions. Transcripts displaying a Log fold change (LFC) >1 were classified as pink, dark red if the LFC > 2, light green if the LFC < -1 and dark green if the LFC < -2. Yellow boxes indicate *p*- values < 0.05.

| Transcript_id          | baseMean | L/D in V.d 12253 |         | L/D in Δfrq 12253 |         | Δfrq/WT in D |         | Δfrq/WT in L |         | Gene    | Antismash  | SM          | Interpro                                                                 |
|------------------------|----------|------------------|---------|-------------------|---------|--------------|---------|--------------|---------|---------|------------|-------------|--------------------------------------------------------------------------|
|                        |          | LF C             | p-value | LF C              | p-value | LF C         | p-value | LF C         | p-value |         |            |             |                                                                          |
| Clock oscillator genes |          |                  |         |                   |         |              |         |              |         |         |            |             |                                                                          |
| VDAG_JR2_C             | 2113.8   |                  |         | -                 |         | -            |         | -            |         | fwd-1   | cluster_63 | cf_putative | F-box; WD40 repeat                                                       |
| hr6g03850              | 9        | 0.07             | 0.51    | 0.21              | 0.10    | 0.16         | 0.08    | 0.45         | 0.00    |         |            |             |                                                                          |
| VDAG_JR2_C             | 1748.3   |                  |         | -                 |         | -            |         | -            |         | wc-1    |            |             | Zinc finger, GATA-type ATP-binding; Helicase; rRNA-processing arch, Ski2 |
| hr2g01990              | 8        | 0.17             | 0.23    | 0.16              | 0.47    | 0.30         | 0.02    | 0.63         | 0.00    |         |            |             |                                                                          |
| VDAG_JR2_C             | 1474.0   | -                |         | -                 |         | -            |         | -            |         | frh     |            |             |                                                                          |
| hr4g00070              | 5        | 0.01             | 0.94    | 0.11              | 0.66    | 0.06         | 0.74    | 0.04         | 0.85    |         |            |             |                                                                          |
| VDAG_JR2_C             | 1236.8   | -                |         | -                 |         | -            |         | -            |         | vvd     |            |             | LOV                                                                      |
| hr3g10380              | 7        | 0.05             | 0.83    | 0.97              | 0.00    | 0.53         | 0.00    | 0.49         | 0.01    |         |            |             |                                                                          |
| VDAG_JR2_C             |          | -                |         | -                 |         | -            |         | -            |         | wc-2    |            |             | Zinc finger, GATA-type                                                   |
| hr7g03830              | 698.85   | 0.10             | 0.47    | 0.23              | 0.17    | 0.68         | 0.00    | 0.82         | 0.00    |         |            |             |                                                                          |
| Photoreceptors genes   |          |                  |         |                   |         |              |         |              |         |         |            |             |                                                                          |
| VDAG_JR2_C             |          | -                |         | -                 |         | -            |         | -            |         | wc-2    |            |             | Zinc finger, GATA-type                                                   |
| hr7g03830              | 698.85   | 0.10             | 0.47    | 0.23              | 0.17    | 0.68         | 0.00    | 0.82         | 0.00    |         |            |             |                                                                          |
| VDAG_JR2_C             | 1748.3   |                  |         | -                 |         | -            |         | -            |         | wc-1    |            |             | Zinc finger, GATA-type                                                   |
| hr2g01990              | 8        | 0.17             | 0.23    | 0.16              | 0.47    | 0.30         | 0.02    | 0.63         | 0.00    |         |            |             |                                                                          |
| VDAG_JR2_C             | 1236.8   | -                |         | -                 |         | -            |         | -            |         | vvd     |            |             | LOV                                                                      |
| hr3g10380              | 7        | 0.05             | 0.83    | 0.97              | 0.00    | 0.53         | 0.00    | 0.49         | 0.01    |         |            |             |                                                                          |
| VDAG_JR2_C             | 1602.1   |                  |         | -                 |         | -            |         | -            |         | rgs-lov |            |             | PAS                                                                      |
| hr1g22390              | 2        | 0.05             | 0.77    | 0.04              | 0.89    | 0.23         | 0.07    | 0.14         | 0.36    |         |            |             |                                                                          |

|                       |        |      |      |      |      |      |      |      |      |              |          |         |                    |
|-----------------------|--------|------|------|------|------|------|------|------|------|--------------|----------|---------|--------------------|
| VDAG_JR2_C            |        | -    |      |      |      | -    |      | -    |      |              | cluster_ |         | Photolyase/cryptoc |
| hr6g00620             | 191.19 | 0.07 | 0.82 | 0.03 | 0.95 | 0.35 | 0.09 | 0.25 | 0.29 | <i>cry-1</i> | 60       | other   | hrome; FAD-        |
| VDAG_JR2_C            | 1433.0 |      |      |      |      | -    |      | -    |      |              |          |         | binding            |
| hr4g09150             | 5      | 0.26 | 0.17 | 0.11 | 0.73 | 0.21 | 0.27 | 0.36 | 0.06 | <i>phy</i>   |          |         | HK; PAS;           |
| VDAG_JR2_C            | 1376.5 | -    |      |      |      |      |      |      |      |              |          |         | Phytochrome        |
| hr7g00170             | 9      | 0.06 | 0.68 | 0.14 | 0.41 | 0.01 | 0.92 | 0.21 | 0.07 | <i>phr</i>   |          |         | DNA-photolyase;    |
|                       |        |      |      |      |      |      |      |      |      |              |          |         | FAD-binding        |
|                       |        |      |      |      |      |      |      |      |      |              |          |         | G-protein glucose  |
| VDAG_JR2_C            |        |      |      |      |      |      |      |      |      | <i>nop-</i>  |          |         | receptor;          |
| hr1g29230             | 614.73 | 0.56 | 0.18 | 0.31 | 0.63 | 0.65 | 0.09 | 0.40 | 0.36 | <i>l</i>     |          |         | Rhodopsin          |
| VDAG_JR2_C            |        |      |      |      |      | -    |      | -    |      |              |          |         |                    |
| hr6g07410             | 386.51 | 0.56 | 0.00 | 0.19 | 0.53 | 0.40 | 0.02 | 0.77 | 0.00 | <i>lov-u</i> |          |         | PAS                |
|                       |        |      |      |      |      |      |      |      |      |              |          |         | Photolyase/cryptoc |
| VDAG_JR2_C            |        |      |      |      |      | -    |      | -    |      | <i>cry-</i>  | cluster_ |         | hrome; FAD-        |
| hr1g17210             | 349.67 | 0.99 | 0.00 | 1.11 | 0.00 | 1.16 | 0.00 | 1.05 | 0.00 | <i>dash</i>  | 8        | terpene | binding            |
| Transcription factors |        |      |      |      |      |      |      |      |      |              |          |         |                    |
| VDAG_JR2_C            |        | -    |      | -    |      | -    |      | -    |      |              |          |         | Zn2 Cys6;Fungal-   |
| hr1g26850             | 91.41  | 1.03 | 0.00 | 0.19 | 0.72 | 0.93 | 0.00 | 0.09 | 0.81 |              |          |         | specific TF        |
| VDAG_JR2_C            | 27062. | -    |      | -    |      | -    |      | -    |      |              |          |         | Zinc finger, C2H2- |
| hr5g05720             | 18     | 1.01 | 0.00 | 0.52 | 0.07 | 0.81 | 0.00 | 0.32 | 0.19 |              |          |         | type               |
| VDAG_JR2_C            | 4202.9 | -    |      | -    |      | -    |      |      |      |              |          |         | Nucleic acid-      |
| hr2g04990             | 2      | 1.05 | 0.00 | 0.67 | 0.06 | 0.35 | 0.20 | 0.03 | 0.93 |              |          |         | binding proteins   |
| VDAG_JR2_C            |        | -    |      | -    |      | -    |      |      |      |              |          |         | Zn2 Cys6;Fungal-   |
| hr1g24030             | 47.75  | 1.23 | 0.00 | 0.53 | 0.17 | 0.20 | 0.52 | 0.50 | 0.12 |              |          |         | specific TF        |
| VDAG_JR2_C            | 1280.9 |      |      |      |      | -    |      | -    |      |              |          |         | Zinc finger, C2H2- |
| hr5g05660             | 8      | 1.33 | 0.00 | 0.75 | 0.01 | 0.01 | 0.98 | 0.58 | 0.01 |              |          |         | type               |
| VDAG_JR2_C            |        |      |      |      |      |      |      |      |      |              | cluster_ | t1pks-  |                    |
| hr1g23950             | 945.69 | 1.68 | 0.00 | 0.69 | 0.24 | 0.13 | 0.81 | 0.87 | 0.05 |              | 14       | nrps    | Zn2 Cys6           |
| VDAG_JR2_C            |        |      |      |      |      |      |      |      |      |              |          |         |                    |
| hr4g03300             | 951.19 | 0.51 | 0.01 | 1.09 | 0.00 | 0.35 | 0.06 | 0.93 | 0.00 |              |          |         | Zn2 Cys6           |

|            |        |      |      |      |      |      |      |      |      |                |                 |                                      |
|------------|--------|------|------|------|------|------|------|------|------|----------------|-----------------|--------------------------------------|
| VDAG_JR2_C | 9249.7 | -    |      | -    |      | -    |      | -    |      | cluster_<br>68 | cf_puta<br>tive | Zinc finger, C2H2-<br>type;Fungal TF |
| hr6g08330  | 7      | 0.76 | 0.00 | 0.45 | 0.01 | 1.27 | 0.00 | 0.95 | 0.00 |                |                 |                                      |
| VDAG_JR2_C |        | -    |      |      |      | -    |      | -    |      |                |                 |                                      |
| hr8g07070  | 412.26 | 0.40 | 0.18 | 0.18 | 0.71 | 1.13 | 0.00 | 0.55 | 0.07 | cluster_<br>19 | cf_puta<br>tive | Zn2 Cys6                             |
| VDAG_JR2_C | 36396. | -    |      | -    |      | -    |      | -    |      |                |                 | Zinc finger, C2H2-<br>type           |
| hr3g04200  | 10     | 0.91 | 0.00 | 0.38 | 0.13 | 1.11 | 0.00 | 0.58 | 0.00 |                |                 |                                      |
| VDAG_JR2_C | 3358.8 |      |      |      |      |      |      |      |      |                |                 | Zn2 Cys6                             |
| hr2g11050  | 9      | 0.59 | 0.00 | 0.47 | 0.01 | 1.10 | 0.00 | 0.97 | 0.00 |                |                 |                                      |
| VDAG_JR2_C |        | -    |      | -    |      | -    |      | -    |      |                |                 |                                      |
| hr2g03990  | 18.20  | 0.77 | 0.11 | 0.07 | 0.94 | 1.31 | 0.00 | 0.48 | 0.32 |                |                 | Fungal-specific TF                   |
| VDAG_JR2_C |        | -    |      |      |      | -    |      | -    |      |                |                 | C2H2 and C2HC                        |
| hr8g00200  | 52.88  | 1.92 | 0.00 | 0.17 | 0.82 | 1.55 | 0.00 | 0.54 | 0.22 |                |                 | zinc fingers                         |
| VDAG_JR2_C | 23846. | -    |      | -    |      | -    |      | -    |      |                |                 |                                      |
| hr7g07100  | 48     | 1.01 | 0.00 | 0.72 | 0.02 | 1.11 | 0.00 | 0.83 | 0.00 | cluster_<br>45 | cf_puta<br>tive | HLH                                  |
| VDAG_JR2_C | 1535.2 | -    |      | -    |      | -    |      | -    |      |                |                 |                                      |
| hr5g05400  | 8      | 0.24 | 0.12 | 0.33 | 0.11 | 0.93 | 0.00 | 1.02 | 0.00 |                |                 | Zn2 Cys6                             |
| VDAG_JR2_C |        |      |      |      |      | -    |      | -    |      |                |                 | Zn2/Cys6 DNA-<br>binding domain      |
| hr1g03770  | 112.66 | 0.86 | 0.00 | 0.28 | 0.60 | 0.88 | 0.00 | 1.47 | 0.00 |                |                 |                                      |
| VDAG_JR2_C | 1305.6 |      |      | -    |      | -    |      | -    |      |                |                 |                                      |
| hr1g10470  | 0      | 0.29 | 0.18 | 0.11 | 0.78 | 0.85 | 0.00 | 1.25 | 0.00 |                |                 | Zn2 Cys6                             |
| VDAG_JR2_C | 2291.0 |      |      | -    |      | -    |      | -    |      |                |                 |                                      |
| hr4g09890  | 0      | 0.17 | 0.38 | 0.15 | 0.62 | 0.72 | 0.00 | 1.03 | 0.00 |                |                 | Zn2 Cys6                             |
| VDAG_JR2_C | 3513.4 |      |      |      |      | -    |      | -    |      |                |                 |                                      |
| hr3g08070  | 5      | 0.75 | 0.00 | 0.29 | 0.45 | 0.67 | 0.00 | 1.13 | 0.00 |                |                 | bZIP                                 |
| VDAG_JR2_C |        | -    |      | -    |      | -    |      | -    |      |                |                 |                                      |
| hr1g27300  | 905.11 | 1.00 | 0.00 | 0.05 | 0.87 | 0.29 | 0.05 | 1.34 | 0.00 |                |                 | Zn2 Cys6                             |
| VDAG_JR2_C |        | -    |      |      |      |      |      |      |      |                |                 | Zn2 Cys6;Fungal-<br>specific TF      |
| hr5g00990  | 503.03 | 0.58 | 0.05 | 0.24 | 0.62 | 0.34 | 0.25 | 1.16 | 0.00 |                |                 |                                      |
| VDAG_JR2_C |        | -    |      |      |      |      |      |      |      |                |                 |                                      |
| hr7g02150  | 631.00 | 0.30 | 0.15 | 0.37 | 0.16 | 0.43 | 0.02 | 1.10 | 0.00 |                |                 | HLH                                  |
| VDAG_JR2_C |        | -    |      |      |      |      |      |      |      |                |                 |                                      |
| hr1g22480  | 307.59 | 0.20 | 0.36 | 0.30 | 0.25 | 0.56 | 0.00 | 1.06 | 0.00 |                |                 | Zn2 Cys6                             |

[illegible]

|            |        |      |      |      |      |      |      |      |      |                |                 |                                   |
|------------|--------|------|------|------|------|------|------|------|------|----------------|-----------------|-----------------------------------|
| VDAG_JR2_C |        | -    |      |      |      |      |      |      |      |                |                 |                                   |
| hr5g10380  | 25.61  | 0.26 | 0.62 | 1.14 | 0.01 | 0.67 | 0.08 | 2.07 | 0.00 | cluster_<br>27 | cf_puta<br>tive | Zn2 Cys6                          |
| VDAG_JR2_C |        |      |      | -    |      | -    |      | -    |      |                |                 | Zn2/Cys6                          |
| hr2g13070  | 264.38 | 0.00 | 0.99 | 0.12 | 0.77 | 1.53 | 0.00 | 1.66 | 0.00 |                |                 |                                   |
| VDAG_JR2_C | 2339.8 | -    |      | -    |      | -    |      | -    |      |                |                 | C2H2                              |
| hr6g07650  | 4      | 0.12 | 0.56 | 0.20 | 0.47 | 1.13 | 0.00 | 1.21 | 0.00 |                |                 |                                   |
| VDAG_JR2_C | 3982.0 | -    |      | -    |      | -    |      | -    |      |                |                 | Homeodomain-like                  |
| hr3g07150  | 6      | 0.15 | 0.44 | 0.20 | 0.47 | 1.02 | 0.00 | 1.06 | 0.00 |                |                 | Nucleic acid-<br>binding proteins |
| VDAG_JR2_C | 11542. |      |      |      |      |      |      |      |      |                |                 |                                   |
| hr1g05850  | 15     | 0.12 | 0.61 | 0.13 | 0.71 | 1.00 | 0.00 | 1.01 | 0.00 |                |                 |                                   |
| VDAG_JR2_C |        | -    |      |      |      |      |      |      |      |                |                 |                                   |
| hr4g03340  | 253.43 | 0.02 | 0.94 | 0.18 | 0.54 | 1.08 | 0.00 | 1.29 | 0.00 |                |                 | Zn2 Cys6                          |
| VDAG_JR2_C |        |      |      |      |      |      |      |      |      |                |                 |                                   |
| hr2g10850  | 51.00  | 0.16 | 0.65 | 0.27 | 0.49 | 1.19 | 0.00 | 1.30 | 0.00 |                |                 | Zn2 Cys6                          |
|            |        |      |      |      |      |      |      |      |      | cluster_<br>17 | t1pks           | Winged helix                      |
| VDAG_JR2_C |        | -    |      |      |      |      |      |      |      |                |                 | DNA-binding                       |
| hr2g00520  | 69.36  | 0.15 | 0.77 | 0.87 | 0.08 | 1.29 | 0.00 | 2.32 | 0.00 |                |                 | domain                            |
| VDAG_JR2_C | 2413.4 |      |      | -    |      |      |      |      |      |                |                 | Zinc finger, C2H2-<br>type        |
| hr8g11340  | 9      | 0.04 | 0.91 | 0.11 | 0.80 | 1.54 | 0.00 | 1.40 | 0.00 |                |                 |                                   |
| VDAG_JR2_C |        | -    |      |      |      |      |      |      |      | cluster_<br>17 | t1pks           |                                   |
| hr2g00510  | 2.81   | 0.27 | 0.65 | 0.30 | NA   | 1.79 | 0.00 | 2.35 | 0.00 |                |                 | Homeodomain-like                  |
| VDAG_JR2_C | 2637.4 |      |      |      |      |      |      |      |      | cluster_<br>78 | nrps            |                                   |
| hr7g10270  | 5      | 0.28 | 0.30 | 0.10 | 0.83 | 2.35 | 0.00 | 2.17 | 0.00 |                |                 | bZIP                              |
| VDAG_JR2_C |        |      |      |      |      | -    |      | -    |      |                |                 |                                   |
| hr3g13030  | 42.82  | 1.35 | 0.00 | 0.67 | 0.19 | 1.10 | 0.00 | 1.78 | 0.00 |                |                 | Zn2 Cys6                          |

**S5 Table.** Most differentially expressed genes in *Δfrq\_12253*. Transcripts displaying a Log fold change (LFC) >1 were classified as pink, dark red if the LFC > 2, light green if the LFC < -1 and dark green if the LFC < -2. Yellow boxes indicate *p*- values < 0.05.

| Transcript_id              | baseMean | L/D in V.d 12253 |         | L/D in Δfrq_12 253 |         | Δfrq/WT in D |         | Δfrq/WT in L |         | Antismash  | SM    | TFs | Interpro                                            |
|----------------------------|----------|------------------|---------|--------------------|---------|--------------|---------|--------------|---------|------------|-------|-----|-----------------------------------------------------|
|                            |          | LF C             | p-value | LF C               | p-value | LF C         | p-value | LF C         | p-value |            |       |     |                                                     |
| Top Up-regulated genes     |          |                  |         |                    |         |              |         |              |         |            |       |     |                                                     |
| VDAG_JR2_Chromosome7g10300 | 121.36   | 0.6              | 0.1     | 0.1                | 0.6     | 3.8          | 0.0     | 3.4          | 0.0     | cluster_78 | nrps  |     | hypothetical protein                                |
| VDAG_JR2_Chromosome4g11240 | 55.89    | 0.0              | 0.9     | 1.2                | 0.0     | 1.9          | 0.0     | 3.1          | 0.0     | cluster_47 | t1pks |     | tubulin-tyrosine ligase                             |
| VDAG_JR2_Chromosome7g10290 | 151.84   | 0.5              | 0.1     | 0.2                | 0.7     | 3.4          | 0.0     | 3.0          | 0.0     | cluster_78 | nrps  |     | hypothetical protein                                |
| VDAG_JR2_Chromosome7g02720 | 1334.29  | -                | 0.8     | 0.5                | 0.2     | 2.3          | 0.0     | 2.9          | 0.0     |            |       |     | Integral membrane protein                           |
| VDAG_JR2_Chromosome2g00550 | 10.31    | 0.3              | 0.5     | 1.3                | 0.0     | 1.9          | 0.0     | 2.8          | 0.0     | cluster_17 | t1pks |     | FAD binding domain-containing protein               |
| VDAG_JR2_Chromosome8g11360 | 452.42   | -                | 0.4     | 0.4                | 0.2     | 2.1          | 0.0     | 2.8          | 0.0     |            |       |     | hypothetical protein                                |
| VDAG_JR2_Chromosome2g00500 | 5.95     | 0.0              | 0.9     | 0.6                | 0.3     | 2.2          | 0.0     | 2.8          | 0.0     | cluster_17 | t1pks |     | hypothetical protein                                |
| VDAG_JR2_Chromosome8g11370 | 1056.59  | -                | 0.6     | 0.4                | 0.2     | 2.0          | 0.0     | 2.7          | 0.0     |            |       |     | S-adenosyl-L-methionine-dependent methyltransferase |
| VDAG_JR2_Chromosome2g00490 | 58.35    | 0.6              | 0.2     | 0.8                | 0.1     | 2.4          | 0.0     | 2.6          | 0.0     | cluster_17 | t1pks |     | serine 3-dehydrogenase                              |

|                            |         |          |          |          |          |          |          |          |          |            |             |                  |                                                     |
|----------------------------|---------|----------|----------|----------|----------|----------|----------|----------|----------|------------|-------------|------------------|-----------------------------------------------------|
| VDAG_JR2_Chromosome7g10260 | 317.52  | 0.2<br>0 | 0.4<br>8 | 0.7<br>9 | 0.0<br>0 | 1.9<br>0 | 0.0<br>0 | 2.4<br>9 | 0.0<br>0 | cluster_78 | nrps        |                  | hypothetical protein                                |
| VDAG_JR2_Chromosome7g02710 | 2265.56 | 0.8<br>0 | 0.0<br>0 | 0.1<br>2 | 0.8<br>1 | 1.4<br>9 | 0.0<br>0 | 2.4<br>2 | 0.0<br>0 |            |             |                  | Cytochrome                                          |
| VDAG_JR2_Chromosome1g24880 | 24.81   | 0.2<br>0 | 0.7<br>3 | 0.4<br>1 | 0.5<br>2 | 2.9<br>9 | 0.0<br>0 | 2.3<br>8 | 0.0<br>0 |            |             |                  | cerato-ulmin hydrophobin                            |
| VDAG_JR2_Chromosome2g00510 | 2.81    | 0.2<br>7 | 0.6<br>5 | 0.3<br>0 | NA       | 1.7<br>9 | 0.0<br>0 | 2.3<br>5 | 0.0<br>0 | cluster_17 | t1pks       | Homeodomain-like | Myb-transcription protein                           |
| VDAG_JR2_Chromosome1g23290 | 36.88   | 0.6<br>7 | 0.0<br>8 | 0.7<br>8 | 0.0<br>6 | 2.4<br>3 | 0.0<br>0 | 2.3<br>3 | 0.0<br>0 | cluster_13 | cf_putative |                  | hypothetical protein                                |
| VDAG_JR2_Chromosome2g00520 | 69.36   | 0.1<br>5 | 0.7<br>7 | 0.8<br>7 | 0.0<br>8 | 1.2<br>9 | 0.0<br>0 | 2.3<br>2 | 0.0<br>0 | cluster_17 | t1pks       | Winged helix     | S-adenosyl-L-methionine-dependent methyltransferase |
| VDAG_JR2_Chromosome5g05550 | 22.44   | 0.7<br>0 | 0.0<br>6 | 0.6<br>6 | 0.1<br>0 | 0.9<br>4 | 0.0<br>0 | 2.3<br>0 | 0.0<br>0 |            |             |                  | hypothetical protein                                |
| VDAG_JR2_Chromosome8g02470 | 55.11   | 0.1<br>6 | 0.7<br>7 | 2.0<br>7 | 0.0<br>0 | 0.3<br>8 | 0.4<br>0 | 2.2<br>8 | 0.0<br>0 |            |             |                  | mannose-6-phosphate isomerase                       |
| VDAG_JR2_Chromosome2g02910 | 43.72   | 1.4<br>5 | 0.0<br>0 | 2.6<br>7 | 0.0<br>0 | 1.0<br>1 | 0.0<br>2 | 2.2<br>2 | 0.0<br>0 |            |             |                  | hypothetical protein                                |
| VDAG_JR2_Chromosome1g27430 | 31.46   | 0.7<br>3 | 0.0<br>5 | 0.3<br>8 | 0.4<br>0 | 1.1<br>1 | 0.0<br>0 | 2.2<br>2 | 0.0<br>0 |            |             |                  | hypothetical protein                                |
| VDAG_JR2_Chromosome8g11350 | 1851.53 | 0.1<br>1 | 0.8<br>0 | 0.0<br>1 | 0.9<br>9 | 2.0<br>6 | 0.0<br>0 | 2.1<br>8 | 0.0<br>0 |            |             |                  | Cytochrome                                          |
| VDAG_JR2_Chromosome7g10270 | 2637.45 | 0.2<br>8 | 0.3<br>0 | 0.1<br>0 | 0.8<br>3 | 2.3<br>5 | 0.0<br>0 | 2.1<br>7 | 0.0<br>0 | cluster_78 | nrps        | bZIP             | bZIP transcription factor                           |

|                            |        |   |     |     |     |     |     |     |     |     |            |            |          |                                                 |             |                                      |
|----------------------------|--------|---|-----|-----|-----|-----|-----|-----|-----|-----|------------|------------|----------|-------------------------------------------------|-------------|--------------------------------------|
| VDAG_JR2_Chromosome8g11140 | 201.79 | - | 0.3 | 0.3 | 0.4 | 0.2 | 1.3 | 0.0 | 2.1 | 0.0 | cluster_17 | t1pks      | Zn2 Cys6 | hypothetical protein                            |             |                                      |
| VDAG_JR2_Chromosome7g04960 | 100.68 | - | 0.7 | 0.1 | 0.4 | 0.4 | 1.9 | 0.0 | 2.1 | 0.0 |            |            |          | NADP-dependent oxidoreductase domain-containing |             |                                      |
| VDAG_JR2_Chromosome2g00540 | 97.06  | - | 0.1 | 0.8 | 1.1 | 0.0 | 0.8 | 0.0 | 2.1 | 0.0 |            |            |          | Alpha/Beta hydrolase                            |             |                                      |
| VDAG_JR2_Chromosome8g09650 | 122.03 | - | 0.7 | 0.0 | 0.6 | 0.2 | 2.2 | 0.0 | 2.0 | 0.0 |            |            |          | Glycoside hydrolase family                      |             |                                      |
| VDAG_JR2_Chromosome5g10380 | 25.61  | - | 0.2 | 0.6 | 1.1 | 0.0 | 0.6 | 0.0 | 2.0 | 0.0 |            |            |          | Zn2-Cys6 transcription factor                   |             |                                      |
| VDAG_JR2_Chromosome4g03070 | 89.63  | - | 2.2 | 0.0 | 1.5 | 0.0 | 2.7 | 0.0 | 1.9 | 0.0 |            |            |          | Stress-induced protein, KGG                     |             |                                      |
| VDAG_JR2_Chromosome6g03720 | 31.42  | - | 1.0 | 0.0 | 0.5 | 0.3 | 2.4 | 0.0 | 1.9 | 0.0 |            |            |          | cluster_63                                      | cf_putative | hypothetical protein                 |
| VDAG_JR2_Chromosome1g05450 | 20.37  | - | 0.5 | 0.3 | 0.1 | 0.8 | 2.2 | 0.0 | 1.4 | 0.0 |            |            |          | cluster_3                                       | cf_putative | Integral membrane protein            |
| VDAG_JR2_Chromosome6g09180 | 468.24 | - | 1.6 | 0.0 | 0.2 | 0.7 | 2.0 | 0.0 | 0.5 | 0.2 |            |            |          | cluster_70                                      | cf_putative | isoamyl alcohol oxidase              |
| VDAG_JR2_Chromosome4g10180 | 840.55 | - | 0.5 | 0.3 | 1.1 | 0.0 | 2.0 | 0.0 | 0.3 | 0.5 |            |            |          |                                                 |             | Endonuclease/Exonuclease/phosphatase |
| Top Down-regulated genes   |        |   |     |     |     |     |     |     |     |     |            |            |          |                                                 |             |                                      |
| VDAG_JR2_Chromosome1g23880 | 410.36 | - | 4.2 | 0.0 | 0.4 | 0.5 | 0.3 | 0.5 | 3.4 | 0.0 | cluster_14 | t1pks-nrps |          | lovastatin nonaketide synthase                  |             |                                      |

|                     |             |               |               |               |               |               |               |        |               |               |                |                 |                                  |
|---------------------|-------------|---------------|---------------|---------------|---------------|---------------|---------------|--------|---------------|---------------|----------------|-----------------|----------------------------------|
| VDAG_JR2_Chrlg23930 | 223.91      | 3.7<br>6      | 0.0<br>0      | 0.7<br>5      | 0.2<br>5      | 0.0<br>1      | 1.0<br>0      | -<br>- | 3.0<br>2      | 0.0<br>0      | cluster_<br>14 | t1pks-<br>nrps  | TOXD protein                     |
| VDAG_JR2_Chrlg23890 | 459.89      | 3.5<br>8      | 0.0<br>0      | 0.6<br>0      | 0.3<br>6      | 0.0<br>1      | 0.9<br>9      | -<br>- | 2.9<br>9      | 0.0<br>0      | cluster_<br>14 | t1pks-<br>nrps  | hypothetical protein             |
| VDAG_JR2_Chrg09780  | 57.25       | 1.7<br>0      | 0.0<br>0      | 0.2<br>0      | 0.8<br>1      | 1.0<br>7      | 0.0<br>1      | -<br>- | 2.9<br>7      | 0.0<br>0      |                |                 | hypothetical protein             |
| VDAG_JR2_Chrlg23910 | 116.12      | 4.1<br>3      | 0.0<br>0      | 1.1<br>6      | 0.0<br>5      | 0.0<br>4      | 0.9<br>5      | -<br>- | 2.9<br>3      | 0.0<br>0      | cluster_<br>14 | t1pks-<br>nrps  | hypothetical protein             |
| VDAG_JR2_Chrlg23920 | 114.15      | 3.4<br>0      | 0.0<br>0      | 0.4<br>7      | 0.5<br>0      | 0.0<br>8      | 0.9<br>1      | -<br>- | 2.8<br>6      | 0.0<br>0      | cluster_<br>14 | t1pks-<br>nrps  | Alpha/Beta hydrolase             |
| VDAG_JR2_Chrlg23940 | 625.82      | 3.3<br>6      | 0.0<br>0      | 0.6<br>9      | 0.3<br>0      | 0.1<br>0      | 0.8<br>8      | -<br>- | 2.5<br>8      | 0.0<br>0      | cluster_<br>14 | t1pks-<br>nrps  | hypothetical protein             |
| VDAG_JR2_Chrg03470  | 5765.1<br>5 | 0.9<br>8      | 0.0<br>1      | 0.1<br>9      | 0.7<br>8      | 1.3<br>7      | 0.0<br>0      | -<br>- | 2.5<br>4      | 0.0<br>0      |                |                 | cytochrome P450<br>monooxygenase |
| VDAG_JR2_Chrg09260  | 36.24       | 1.0<br>8      | 0.0<br>2      | 0.2<br>9      | 0.7<br>1      | 1.6<br>6      | 0.0<br>0      | -<br>- | 2.4<br>4      | 0.0<br>0      |                |                 | hypothetical protein             |
| VDAG_JR2_Chrg03670  | 1016.6<br>8 | -<br>1.9<br>9 | -<br>0.0<br>0 | -<br>0.1<br>5 | -<br>0.8<br>2 | -<br>4.2<br>7 | -<br>0.0<br>0 | -<br>- | -<br>2.4<br>4 | -<br>0.0<br>0 | cluster_<br>63 | cf_puta<br>tive | hypothetical protein             |
| VDAG_JR2_Chrlg22700 | 4387.4<br>6 | 0.4<br>6      | 0.0<br>7      | 0.3<br>4      | 0.3<br>7      | 1.5<br>8      | 0.0<br>0      | -<br>- | 2.3<br>8      | 0.0<br>0      |                |                 | hypothetical protein             |

|                            |          |               |               |               |               |               |               |               |               |                           |             |                               |
|----------------------------|----------|---------------|---------------|---------------|---------------|---------------|---------------|---------------|---------------|---------------------------|-------------|-------------------------------|
| VDAG_JR2_Chromosome4g04340 | 2563.03  | -<br>1.1<br>9 | 0.0<br>0      | 0.3<br>7      | 0.5<br>5      | -<br>3.8<br>7 | 0.0<br>0      | -<br>2.3<br>2 | 0.0<br>0      |                           |             | hypothetical protein          |
| VDAG_JR2_Chromosome6g04130 | 796.94   | 0.5<br>8      | 0.1<br>1      | 0.0<br>9      | 0.9<br>1      | 1.7<br>9      | 0.0<br>0      | 2.2<br>8      | 0.0<br>0      |                           |             | hypothetical protein          |
| VDAG_JR2_Chromosome4g11840 | 41.01    | 1.1<br>0      | 0.0<br>0      | 0.0<br>1      | 0.9<br>9      | 1.1<br>5      | 0.0<br>0      | 2.2<br>7      | 0.0<br>0      |                           |             | hypothetical protein          |
| VDAG_JR2_Chromosome5g01890 | 247.82   | 1.5<br>6      | 0.0<br>0      | 0.1<br>6      | 0.7<br>5      | 0.4<br>9      | 0.0<br>7      | 2.2<br>2      | 0.0<br>0      | Zn2/Cys6<br>-Fungal<br>TF |             | Zn2-Cys6 transcription factor |
| VDAG_JR2_Chromosome6g08940 | 153.16   | 1.2<br>2      | 0.0<br>1      | 0.4<br>2      | 0.5<br>6      | 1.3<br>8      | 0.0<br>0      | 2.1<br>9      | 0.0<br>0      | cluster_69                | cf_putative | cytochrome P450               |
| VDAG_JR2_Chromosome8g06660 | 13626.04 | 0.0<br>0      | 0.9<br>9      | 0.6<br>8      | 0.0<br>6      | 1.4<br>5      | 0.0<br>0      | 2.1<br>4      | 0.0<br>0      |                           |             | Ammonium/urea transporter     |
| VDAG_JR2_Chromosome8g09770 | 50.00    | 1.0<br>5      | 0.0<br>1      | 0.3<br>6      | 0.5<br>8      | 0.7<br>2      | 0.0<br>7      | 2.1<br>3      | 0.0<br>0      |                           |             | hypothetical protein          |
| VDAG_JR2_Chromosome1g22660 | 1015.42  | 0.8<br>7      | 0.0<br>0      | 0.0<br>6      | 0.9<br>2      | 1.2<br>3      | 0.0<br>0      | 2.0<br>4      | 0.0<br>0      |                           |             | UDP-glucose 4-epimerase       |
| VDAG_JR2_Chromosome1g01960 | 4976.56  | -<br>0.0<br>1 | -<br>0.9<br>8 | -<br>0.7<br>7 | -<br>0.0<br>0 | -<br>2.8<br>2 | -<br>0.0<br>0 | -<br>2.0<br>4 | -<br>0.0<br>0 |                           |             | Frequency clock protein       |
| VDAG_JR2_Chromosome1g09750 | 2398.82  | -<br>0.8<br>4 | -<br>0.0<br>0 | -<br>0.0<br>4 | -<br>0.9<br>4 | -<br>1.1<br>6 | -<br>0.0<br>0 | -<br>2.0<br>3 | -<br>0.0<br>0 |                           |             | cholesterol oxidase           |

|                            |         |          |          |          |          |          |          |          |          |                             |
|----------------------------|---------|----------|----------|----------|----------|----------|----------|----------|----------|-----------------------------|
| VDAG_JR2_Chromosome6g06730 | 959.89  | 0.3<br>3 | 0.5<br>9 | 1.6<br>8 | 0.0<br>0 | 0.0<br>1 | 0.9<br>9 | 2.0<br>1 | 0.0<br>0 | Protein of unknown function |
| VDAG_JR2_Chromosome3g06750 | 104.25  | 1.2<br>8 | 0.0<br>1 | 0.3<br>0 | 0.7<br>1 | 2.7<br>7 | 0.0<br>0 | 1.2<br>0 | 0.0<br>1 | hypothetical protein        |
| VDAG_JR2_Chromosome5g10060 | 42.49   | 0.4<br>6 | 0.3<br>9 | 0.1<br>7 | 0.8<br>4 | 2.3<br>0 | 0.0<br>0 | 1.6<br>7 | 0.0<br>0 | hypothetical protein        |
| VDAG_JR2_Chromosome1g09640 | 1869.91 | 0.2<br>6 | 0.5<br>3 | 0.5<br>4 | 0.2<br>8 | 2.0<br>2 | 0.0<br>0 | 1.2<br>2 | 0.0<br>0 | Integral membrane protein   |
